1 **A rapid pharmacogenomic assay to detect *NAT2* polymorphisms and guide isoniazid dosing**  
2 **for tuberculosis treatment**

3  
4 **Authors:** Renu Verma<sup>1</sup>, Sunita Patil<sup>1</sup>, Nan Zhang<sup>2</sup>, Flora Martinez Figueira Moreira<sup>3</sup>, Marize  
5 Teixeira Vitorio<sup>3</sup>, Andrea da Silva Santos<sup>3</sup>, Ellen Wallace<sup>4</sup>, Devasena Gnanashanmugam<sup>4</sup>, David  
6 Persing<sup>4</sup>, Rada Savic<sup>2</sup>, Julio Croda<sup>5,6</sup>, Jason R. Andrews<sup>1\*</sup>

- 7  
8 1. Division of Infectious Diseases and Geographic Medicine, Stanford University School of  
9 Medicine, Stanford, CA, USA  
10 2. Department of Bioengineering and Therapeutic Sciences, University of California, San  
11 Francisco, CA, USA  
12 3. Federal University of Grande Dourados, Dourados, Brazil  
13 4. Cepheid Inc., Sunnyvale, California, USA  
14 5. Postgraduate Program in Infectious and Parasitic Diseases, Federal University of Mato  
15 Grosso do Sul, Mato Grosso do Sul, Brazil  
16 6. Oswaldo Cruz Foundation Mato Grosso do Sul, Mato Grosso do Sul, Brazil

17  
18 **Keywords:** tuberculosis; isoniazid; pharmacogenomic; molecular diagnostic; *NAT2*

19 **Abstract Word Count:** 183

20 **Word Count:** 3,817

21 **Tables:** 3

22 **Figures:** 4

23 **Reference:** 50

24

25 **Correspondence\***

26 Jason Andrews, MD

27 Division of Infectious Diseases and Geographic Medicine

28 Biomedical Innovations Building, Room 3458

29 Stanford University School of Medicine

30 Stanford, CA 94305

31 Email: [jandr@stanford.edu](mailto:jandr@stanford.edu)

32 Phone: +1 650 497 2679

33

34

35 **Abstract**

36 Treatment of tuberculosis involves use of standardized weight-based doses of antibiotics, but  
37 there remains a substantial incidence of toxicities, inadequate treatment response, and relapse, in  
38 part due to variable drug levels achieved. Single nucleotide polymorphisms (SNPs) in the N-  
39 acetyltransferase-2 (*NAT2*) gene explain 88% of interindividual pharmacokinetic variability of  
40 isoniazid, one of the two most important antitubercular antibiotics. A major obstacle to  
41 implementing pharmacogenomic guided dosing is the lack of a point-of-care assay. We trained  
42 an acetylation genotype classification model from a global dataset of 5,738 genomes, which  
43 achieved 100% accuracy in out-of-sample prediction on unphased SNPs from 2,823 samples  
44 using 5 SNPs. On a clinical dataset of 49 patients with tuberculosis, we found that a 5 SNP assay  
45 accurately predicted acetylation ratios and isoniazid clearance. We then developed a cartridge-  
46 based molecular assay for the 5 SNPs on the GeneXpert platform, which enabled accurate  
47 classification of allele patterns directly from as little as 25 ul of whole blood. An automated  
48 pharmacogenomic assay on a platform widely used globally for tuberculosis diagnosis could  
49 enable improved dosing of isoniazid, averting toxicities and improving treatment outcomes.

50

## 51 INTRODUCTION

52 Despite the availability of effective chemotherapeutic regimens for treatment and prevention of  
53 tuberculosis, a substantial proportion of patients experience toxicities, fail treatment or develop  
54 recurrent disease<sup>1-3</sup>. Standardized, weight-based dosing of anti-tuberculosis treatment has been  
55 the conventional approach to therapy, despite mounting evidence that inter-individual variability  
56 in metabolism leads to highly variable drug levels<sup>4,5</sup>. High drug levels are strongly associated  
57 with risk of toxicity, while low drug levels are a determinant of treatment failure, slow response,  
58 and emergence of drug resistance. Hepatotoxicity is the most common adverse effect, affecting  
59 up to 33% of patients receiving standard four-drug therapy<sup>6</sup> and leading to regimen changes in  
60 up to 10% of patients<sup>7</sup>. This toxicity is associated with increased costs, morbidity, and occasional  
61 mortality, particularly among HIV co-infected individuals<sup>8</sup>. Additionally, as many as 3% of new  
62 tuberculosis cases experience treatment failure, and between 6-10% relapse within 2 years<sup>9,10</sup>  
63 Pharmacokinetic variability to a single drug is associated with treatment failure and acquired  
64 drug resistance<sup>11,12</sup>. One recent study found that individuals with at least one drug below the  
65 recommended AUC threshold had a 14-fold increased risk of poor outcomes.<sup>13</sup>

66 There has been an increasing number of genetic markers identified that predict metabolism and  
67 toxicities from various antimicrobials. Isoniazid (INH) is among the most well characterized of  
68 these, with 88% of its pharmacokinetic variability explained by mutations in the gene encoding  
69 arylamine N-acetyltransferase 2 (NAT2), responsible for acetylation in the liver<sup>14</sup>. Individuals  
70 can be classified into three phenotypes—rapid, intermediate, and slow acetylators—according to  
71 whether they carry polymorphisms on neither, one, or both copies of this gene, respectively.  
72 Rapid acetylators typically have the lowest plasma INH concentrations, while slow acetylators

73 have high concentrations. A worldwide population survey on *NAT2* acetylation phenotype  
74 reported that more than half of the global population are slow or rapid acetylators<sup>15</sup>. Numerous  
75 studies have investigated the relationship between acetylation genotype or phenotype and clinical  
76 outcomes of tuberculosis treatment. A recent meta-analysis found that rapid acetylators are twice  
77 as likely to have microbiological failure and acquired drug resistance<sup>16</sup>. Additional meta-analyses  
78 have identified a three- to four-fold increased risk of hepatotoxicity among slow acetylators<sup>17,18</sup>.  
79 A recent randomized trial of pharmacogenomic guided dosing for tuberculosis treatment found  
80 that, compared with standard dosing, it reduced hepatotoxicity among slow acetylators and  
81 increased treatment response at 8 weeks among rapid acetylators<sup>19</sup>

82  
83 Despite this evidence, pharmacogenomic testing and guided treatment has not entered the  
84 mainstream of clinical practice for tuberculosis. Few clinical laboratories perform *NAT2*  
85 genotyping, and such testing is not widely available in resource-constrained environments where  
86 the majority of tuberculosis burden falls. To address this gap, we developed a prototype *NAT2*  
87 pharmacogenomic (*NAT2*-PGx) assay on a commercial, automated PCR platform (GeneXpert)  
88 to detect *NAT2* polymorphisms. We further developed an in-house algorithm to predict INH  
89 metabolism phenotype from unphased single nucleotide polymorphism (SNP) patterns, derived  
90 from globally representative genomic data. We demonstrate that this tool can accurately predict  
91 INH clearance rates directly from clinical samples.

92

93

## 94 **RESULTS**

### 95 **SNP selection and development of acetylation prediction model**

96 Complete phased data for the seven known polymorphisms (191G>A, rs1801279; 282C>T,  
97 rs1041983; 341T>C, rs1801280; 481C>T, rs1799929; 590G>A, rs1799930; 803A>G, rs1208;  
98 and 857G>A, rs1799931) altering *NAT2* gene function were available for 8,561 individuals from  
99 59 populations. The dataset contains 3,573 (41.7%) individuals with the slow genotype, 3,428  
100 (40.0%) individuals with the intermediate genotype, and 1,560 (18.2%) individuals with the  
101 rapid genotype (See **Table 1**). The highest proportion of rapid acetylators were in East Asia  
102 (40%), and three regions had prevalence of slow acetylator phenotypes over 50% (Central and  
103 South Asia, Europe and North Africa).

104 We used these phased allele data to select SNPs for inclusion in an assay measuring unphased  
105 SNPs. Using a random forest model trained on two thirds of the data (n=5,738), out-of-sample  
106 phenotype prediction accuracy from unphased data on the remaining one third (n=2,823) was  
107 100% for models using 7, 6 or 5 SNPs. With 4 SNPs, prediction accuracy was 98.0% (95% CI:  
108 97.4-98.5%), and a 3 SNP model had similar performance (98.0%; 95% CI: 97.4-98.4%) (**Table**  
109 **2**). However, both of these models performed poorly on data from Sub-Saharan Africa (4 SNP  
110 model accuracy: 82.5%, 95% CI: 78.1-86.4%); 3 SNP model accuracy: 81.3%, 95% CI: 76.8-  
111 85.3%). Based on these results, we selected the 5 SNP model (191G>A, 282C>T, 341T>C,  
112 590G>A and 857G>A) to take forward for clinical validation and diagnostic development.

113

### 114 **Genotype correlation with isoniazid clearance in patients with tuberculosis**

115

116 We enrolled a cohort of 49 patients with newly diagnosed pulmonary tuberculosis and collected  
117 plasma at 1 hour and 8 hours after dose on day 1 and at 1 hour after dose on day 14. To detect  
118 five NAT2 polymorphisms identified by our classifier, we performed single-plex PCR assays on  
119 49 sputum samples using molecular beacon probes developed in-house (see Methods).  
120 Additionally, we used commercial 7-SNP single-plex genotyping assays and compared the  
121 results with 5-SNP single-plex PCR to validate the melt curve accuracy. There was 100%  
122 concordance in terms of SNP detection between 5-SNP and commercial 7-SNP assays. Of the 49  
123 individuals for whom NAT2 genotypes were profiled,  $\Delta T_m$  ( $^{\circ}\text{C}$ ) between wild-type and mutant  
124 alleles for positions 191, 282, 341, 590 and 857 were found to be 4.38, 4.04, 2.40, 3.63 and 3.68  
125 respectively. Both mutant and wild type probes had a minimum  $2.40^{\circ}\text{C}$   $T_m$  difference which  
126 allowed SNP calling with high accuracy (**Table 3**).

127  
128 We further predicted phenotypes from 5-SNP using the algorithm described above as well as a  
129 publicly available tool (NAT2Pred)<sup>20</sup>, which uses 6 SNPs. Among the 49 participants, predicted  
130 acetylator types from the 5 SNP assay were: 28 (57%) slow, 16 (33%) intermediate and 5 (10%)  
131 rapid. NAT2Pred classified 4 samples as intermediate that were classified as rapid (n=1) or slow  
132 (n=3) by the 5 SNP classifier. Among those classified as slow by the 5 SNP classifier and  
133 intermediate by NAT2Pred, acetyl-INH to INH ratios at 8 hours were 0.61, 0.38, 0.41, consistent  
134 with slow acetylation (median: 0.77, range 0-1.55) rather than intermediate acetylation (median  
135 6.67, range 3.32-22.21) and suggesting misclassification by NAT2Pred. The sample classified as  
136 intermediate by NAT2Pred and rapid by the 5 SNP classifier had an acetyl-INH to INH ratio of  
137 9.8, which fell between the median values, and within both ranges, for intermediate and rapid  
138 acetylators (range 8.09 -  $\infty$ ) (**Supplementary Table-1**). Phenotypes predicted by the 5 SNP

139 classifier were strongly predictive of INH acetylation and clearance (**Figure 1a and 1b**). INH  
140 clearance rates were lowest in slow acetylators (median 19.3 L/hr), moderate in intermediate  
141 acetylators (median 41.0 L/hr) and highest in fast acetylators (median 46.7 L/hr).

142

### 143 **Development of an automated pharmacogenomic assay**

144

145 Using the primers and probes sequences validated on FAM-labelled single-plex assays targeting  
146 five *NAT2* polymorphisms, we developed a 5-plex multiplex assay using the FleXible Cartridge  
147 system on the GeneXpert platform, which enables automated extraction, real-time PCR, melt  
148 curve analysis and interpretation in 140 minutes (**Figure 2**). We performed the assay on 20  
149 whole blood samples from healthy individuals. Mutant, wild-type and heterozygous alleles were  
150 manually called based on peak patterns and  $T_m$  values detected in melt curves. Negative  
151 derivative transformed melt curves from five *NAT2* gene polymorphisms are shown in **Figure 3**.  
152 The genotype data generated on GeneXpert was validated by Sanger sequencing. The assay  
153 detected all polymorphisms with 100% accuracy (average SD in  $T_m$  across all probes = 0.34°C).  
154 The *NAT2* genotypes corresponding to 20 blood samples covered all three categories - mutant,  
155 wild-type and heterozygous for five *NAT2* positions except for *NAT2*-191 for which all samples  
156 were all wild-type. Among the 20 samples, predicted acetylator types using the 5-SNP classifier  
157 were: 8 (40%) slow, 10 (50%) intermediate and 2 (10%) rapid (**Supplementary Table 2a**).

158

159 We used whole blood samples from ten healthy volunteers to assess the analytic performance of  
160 the *NAT2*-PGx assay at lower sample volumes. The samples at decreasing volumes (200ul,  
161 100ul, 50ul and 25ul) were analyzed until the point where all melt peaks could be accurately



162 detected by GeneXpert. Our assay could accurately detect all melt peaks with as low as 25ul of  
163 sample volume. The variability in T<sub>m</sub> from five NAT2 probes for sample volumes 200ul-25ul is  
164 shown in **Figure 4**. NAT2 polymorphisms were accurately detected at all volumes  
165 **(Supplementary Table 2b)**.

166

167 **DISCUSSION**

168

169 Despite availability of effective treatment for drug-sensitive tuberculosis, a substantial  
170 proportion of population encounters drug associated toxicity or treatment failure, much of which  
171 could be averted through dosing guided by genetic markers of drug metabolism<sup>21,22</sup>. We  
172 previously found that pharmacogenomic guided dosing of isoniazid could be highly cost-  
173 effective in low- and middle-income countries<sup>23</sup>. A major barrier to its implementation has been  
174 the lack of a simple, scalable assay that could be used at points of care where tuberculosis is  
175 treated in resource-constrained settings. To address this gap, we used globally representative  
176 genomic data to identify patterns of 5 SNPs that enable accurate prediction of isoniazid  
177 acetylator phenotype, validating this with pharmacokinetic data of patients receiving tuberculosis  
178 treatment. We then developed a prototype automated pharmacogenomic assay on the GeneXpert  
179 platform, which is widely available globally but had never been applied to pharmacogenomics.  
180 We found that this assay could robustly distinguish wild type, mutant and heterozygous alleles  
181 from a range of blood volumes as low as 25 ul, making it suitable for use with venous blood  
182 samples or finger-stick blood samples. The assay requires minimal hands-on time for sample  
183 preparation, which would facilitate its use in resource-constrained settings.

184

185 An earlier model (“NAT2Pred”) predicted NAT2 acetylation phenotype from unphased genomic  
186 data; however, it had moderate error rates in distinguishing intermediate from rapid acetylators<sup>24</sup>.  
187 Moreover, error rates among individuals from Sub-Saharan Africa were 14%, in part due to the  
188 exclusion of the G191A (R64Q) SNP, common to the NAT2 \*14 allele cluster, which is frequent  
189 in Africans and African-Americans, but virtually absent in Caucasian, Indian, and Korean

190 populations<sup>25</sup>. Indeed, striking ethnic differences in the frequencies of SNPs  
191 (<http://snp500cancer.nci.nih.gov>) are responsible for the differences in frequency of rapid,  
192 intermediate and slow acetylator *NAT2* alleles or haplotypes and therefore phenotypes<sup>15, 26, 27</sup>. We  
193 trained our SNP classifier with globally representative data, which resulted in the selection and  
194 inclusion of the G191A SNP in our model and assay. This is particularly important as Sub-  
195 Saharan Africa bears a substantial burden of tuberculosis disease and mortality as well as HIV  
196 co-infection, which is independently associated with greater pharmacokinetic variability and  
197 tuberculosis treatment toxicity<sup>28-31</sup>.

198  
199 The association between acetylation polymorphisms and isoniazid metabolism was first  
200 demonstrated in 1959, and their importance was well characterized in subsequent decades  
201 through phenotypic descriptions<sup>32-34</sup>. Subsequent genotypic descriptions confirmed that *NAT2*  
202 polymorphisms predicted isoniazid early bactericidal activity, and clinical outcomes including  
203 hepatotoxicity, relapse and acquisition of drug resistance. Further dosing studies demonstrated  
204 that provision of lower doses to slow acetylators and higher doses to rapid acetylators could  
205 achieve target concentrations<sup>35</sup>. One randomized trial of pharmacogenomic-guided dosing of  
206 isoniazid during active tuberculosis treatment found that it significantly reduced toxicities  
207 (among slow acetylators) and treatment non-response (among rapid acetylators). Taken together,  
208 the evidence for pharmacogenomic guided dosing to achieve consistent drug levels and improve  
209 clinical outcomes is strong. Automated, easy-to-use assays could enable pharmacogenomic  
210 guided isoniazid dosing in resource constrained settings, where a substantial burden of the  
211 world's tuberculosis occurs.

212

213 The findings of this study are subject to several limitations. We tested the assays on 49  
214 individuals with active tuberculosis and 20 healthy individuals with a diverse representation of  
215 polymorphisms, but the number of participants with G191A mutations was limited (n=5). A  
216 larger validation study involving testing on whole blood, including from finger stick capillary  
217 blood, is needed to assess real-world performance of this assay under field conditions. Further  
218 studies should also investigate testing on non-invasive samples including saliva or oral swabs,  
219 from which DNA is abundant. Second, we focused on NAT2 polymorphisms, as they explain  
220 88% of interindividual pharmacokinetic variability, though polymorphisms in several other  
221 genes have been associated with hepatotoxicity. However, these associations have been  
222 comparatively modest and somewhat inconsistent<sup>36-40</sup>. We focused on isoniazid and did not  
223 include other important tuberculosis drugs, such as rifampicin. The evidence base for  
224 pharmacogenomic markers predicting rifampin pharmacokinetics is less robust, and findings  
225 concerning clinical outcomes such as toxicities or treatment response are limited<sup>41,42</sup>. However,  
226 given the importance of this drug class in treatment of active and latent tuberculosis, and  
227 emerging evidence supporting greater efficacy of higher doses of rifampin, further investigation  
228 of pharmacogenomic markers in rifampicin is needed. Future assays may include polymorphisms  
229 influencing rifampicin metabolism to further optimize treatment of tuberculosis.

230

231 Since the demonstration of the efficacy of six month, short-course chemotherapy in 1979,  
232 standardized treatment for drug susceptible tuberculosis using weight-based doses has remained  
233 essentially unchanged<sup>43</sup>. Additionally, isoniazid remains a major component of regimens for  
234 treatment of latent tuberculosis, which is recommended by the WHO for young children, HIV-  
235 infected individuals and household contacts of tuberculosis cases<sup>44</sup>. More than half the world's

236 population have slow or rapid acetylation phenotypes, which put them at risk for excessive drug  
237 levels resulting in drug toxicities or insufficient drug levels putting them at risk of acquired drug  
238 resistance or disease relapse. Dose adjustment based on NAT2 acetylation genotyping can  
239 achieve consistent, target drug levels and reduce the incidence of poor clinical outcomes. We  
240 developed a prototype automated, cartridge-based assay that can reliably predict acetylation  
241 phenotype directly from as low as 25 ul of whole blood. By developing this for the GeneXpert  
242 platform, which is widely used in low- and middle-income countries for tuberculosis diagnosis,  
243 this assay could make personalized tuberculosis treatment dosing available in resource-  
244 constrained settings. Further studies are needed to evaluate its accuracy and clinical impact in  
245 real-world clinical settings.

246

## 247 **METHODS**

248

### 249 **Ethics statement**

250 The clinical study was approved by the institutional review boards of the Stanford University  
251 School of Medicine and Federal University of Grande Dourados (IRB#33005). All participants  
252 were over the age of 18 and provided written informed consent. For assay optimization and  
253 validation on GeneXpert cartridge, anonymized blood samples from healthy individuals were  
254 obtained from Stanford blood center.

255

### 256 **Datasets**

257 The datasets used to develop the NAT2 classifier was obtained from the IGSR (International  
258 Genome Sample Resource, 1000 genomes project) and a meta-analysis by Sabbagh et. al<sup>4,25</sup>.  
259 Population information on the combined dataset is provided in **Supplementary Table 3**.

#### 260 **NAT2 acetylator phenotype prediction classifier**

261 Phased genomes from 8,561 individuals were used and haplotypes were labeled based on 7  
262 polymorphic sites in the *NAT2* gene (191G>A, 282C>T, 341T>C, 481C>T, 590G>A, 803A>G  
263 and 857G>A), following an international consensus nomenclature (43). Individuals with two  
264 slow haplotypes were considered slow acetylators; those with two rapid haplotypes were  
265 considered rapid acetylators; and those with one slow and one rapid acetylator were considered  
266 intermediate acetylators. We then constructed an unphased dataset containing only information  
267 on whether each sample was wild type for both alleles, homozygous variant for both alleles, or  
268 heterozygous. We then split the dataset into two-thirds for a training set and one third for an out-  
269 of-sample test set, using sampling stratified by geographic representation to ensure  
270 representativeness in the training and test sets. We trained a random forest model on the training  
271 set using the *caret* package in R<sup>45</sup> and assessed classification performance on the test set. We  
272 began with a 7 SNP model and eliminated SNPs in sequential models according to the lowest  
273 variable importance factor.

274

#### 275 **Sample collection**

276 Sputum and plasma samples from 49 newly diagnosed patients with active pulmonary  
277 tuberculosis were collected at the Federal University of Grande Dourados, Brazil. All  
278 participants were treated with standardized, weight-based doses of isoniazid, rifampicin,

279 pyrazinamide and ethambutol. Plasma samples were collected at 1 hour and 8 hours after the first  
280 dose and after 1 hour on day 14. Plasma drug concentrations for isoniazid and acetyl-isoniazid  
281 were quantified by high-performance liquid chromatography coupled to tandem mass  
282 spectrometry (HPLC-MS) as previously described.<sup>46</sup>

283

## 284 **Reference NAT2 SNP genotyping assays**

### 285 *Sputum processing, host DNA extraction and single-plex assays on clinical samples*

286 Spontaneously expectorated sputum from confirmed pulmonary tuberculosis patients was  
287 collected in approximately 10mL of guanidine thiocyanate (GTC) solution (5 M guanidinium  
288 thiocyanate, 0.5% w/v sodium N-lauryl sarcosine, 25 mM trisodium citrate, 0.1 M 2-  
289 mercaptoethanol, 0.5% w/v Tween 80 [pH 7.0]) as described previously<sup>47</sup>. The samples were  
290 needle sheared and centrifuged at 3000 rpm for 30 min. The supernatant was removed leaving  
291 behind 1ml pellet. The pellet was centrifuged at 11,500 rpm for 3 min. Approximately 0.5 ml  
292 supernatant was transferred to a fresh cryovial and 0.75 ml Trizol LS was added to the  
293 supernatant. The samples were frozen at -80 until used. Host DNA was extracted from the  
294 supernatant using a manual extraction method described previously<sup>48</sup>. The DNA was eluted in 50  
295 ul DNase-free water and quantified on Qubit. Approximately 10 ng of genomic DNA was used  
296 for each single-plex melt curve and commercial TaqMan SNP (NAT2 TaqMan® SNP  
297 Genotyping Assays, Applied Biosystems) assay.

298

### 299 *DNA extraction from whole blood samples from healthy individuals*

300 For 5-plex assay validation, genomic DNA from 100ul of whole blood from healthy individuals  
301 was extracted using Qiagen Blood and tissue kit (# 69504). The DNA was eluted in 30ul DNase-  
302 free water and quantified on Qubit. 100ng of DNA was used for Sanger sequencing validation.

303

#### 304 **PCR amplification for Sanger DNA sequencing**

305 For DNA sequencing, an 823 bp fragment of the NAT2 gene (819–1641 bp of the gene) was  
306 amplified using the forward primer 5'-GGGCTGTTCCCTTTGAGA-3' and reverse primer 5'-  
307 TAGTGAGTTGGGTGATAC-3'. A 20 µl PCR mixture contained 0.5 µl of each forward and  
308 reverse primers from 10 µM stocks, 8 µl double distilled water, 0.5ul Phusion Taq polymerase  
309 and 1 µl (~100ng) DNA template. PCR was performed with initial denaturation at 95°C for 5  
310 min followed by 30 cycles of denaturation at 95°C for 30 s, annealing at 55°C for 30 s and  
311 extension at 72°C for 1 min, with an additional extension at 72°C for 10 min. PCR products were  
312 analyzed on 1.5% agarose gels to confirm size of product which was then sequenced at the  
313 (Stanford PAN Facility, CA).

314

#### 315 **Primers and probes for melt curve analysis**

316 Three sets of primers spanning the *NAT2* gene were used for single-plex and multiplex PCR.  
317 Primers and sloppy molecular beacon (SMB) probes were designed using Beacon Designer  
318 (Premier Biosoft International, Palo, CA; version 8). Three of 5 molecular beacon probes  
319 (NAT2-191, NAT2-590 and NAT2-857) were designed with 100% complementarity towards  
320 mutant alleles and two (NAT2-282 and NAT2-341) were 100% specific to wild type alleles. For  
321 single-plex assays, all probes were labelled with FAM at their 5' end and BHQ-1 at 3'. For the  
322 multiplex assay on GeneXpert, FAM was replaced with other fluorophores except for NAT2-



323 590. A list of primers and probes sequences for the multiplex assay with their corresponding  
324 fluorophores and quenchers is provided in **Supplementary Table 4**.

325

### 326 **Single-plex PCR and melt curve analysis on pulmonary TB patients**

327 Genomic DNA extracted from sputum samples from TB positive patients was used for single-  
328 plex assays performed on StepOne Plus Real Time PCR. A 20ul total reaction volume was set up  
329 using 10ng genomic DNA per assay. PCR mastermix included (0.5 ul of 2U Aptataq exo-DNA  
330 polymerase, 1X betaine, 1X Aptataq buffer, 4mM MgCl<sub>2</sub>, 1X ROX passive reference dye, 60nM  
331 FP,1000nM reverse primers, 250uM of each probe). PCR was initiated by 10 min of  
332 denaturation–activation at 95°C, followed by 50 cycles at 95°C for 15 sec (denaturation),  
333 annealing at 60°C for 15 s and extension at 76°C for 20sec. The melting program included three  
334 steps: denaturation at 95°C for 1 min, followed by renaturation at 35°C for 3 min and a  
335 continuous reading of fluorescence from 45 to 85°C by heating at increments of 0.03°C/s. The  
336 MMCA curve was analyzed using the StepOne Plus software version 2.0. For single-plex melt  
337 curve assay validation, TaqMan 7-SNP genotyping assays were performed using commercial  
338 assays (NAT2 TaqMan® SNP Genotyping Assays, Applied Biosystems) on DNA extracted from  
339 sputum samples from 49 pulmonary TB patients on a StepOne Plus Real Time PCR machine.

340

### 341 **Pharmacokinetic analysis of INH clearance in tuberculosis patients**

342 The population PK analysis was performed using the non-linear mixed effects modeling  
343 approach using NONMEM (version 7.4.3; ICON plc, Gaithersburg, MD, USA), PsN and R-  
344 based Xpose (version 4.7 and higher)<sup>49,50</sup>. One-compartment model with a first-order absorption  
345 with a lognormal distribution for inter-individual variability (IIV) on different PK parameter(s)

346 as well as an additive and/or proportional model for the residual error were tested for the base  
347 model selection. Mixture models with two or three subpopulations representing different  
348 clearance rate were then evaluated. The first-order conditional estimation with interaction  
349 method (FOCEI) was applied and the model-building procedure and model selection was based  
350 on the log-likelihood criterion (the difference in the minimum OFV between hierarchical models  
351 was assumed to be Chi-square distributed with degrees of freedom equal to the difference in the  
352 number of parameters between models), goodness-of-fit plots (e.g. relevant residuals against  
353 time randomly distributed around zero), and scientific plausibility of the model. Visual predictive  
354 check was conducted to evaluate whether the final model with estimated fixed-effect parameters  
355 and covariates adequately describe data.

356

### 357 **Automated NAT2-PGx Multiplex PCR and melt curve analysis**

358 Asymmetric PCR and melt curve analysis were performed on a GeneXpert IV instrument using  
359 GeneXpert Dx 4.8 software (Cepheid, Sunnyvale). Flex cartridge-01 (Cepheid) were used to  
360 perform automated DNA extraction from whole blood followed by PCR amplification and melt  
361 curve analysis to detect SNPs. PCR and melt conditions were optimized using mastermix  
362 prepared in house. The NAT2-PGx assay was performed in an 80ul reaction volume (70ul  
363 mastermix and 10ul eluted DNA). Briefly, 100ul of whole blood was mixed with 900ul of lysis  
364 buffer (Cepheid) in a 1.5ml Eppendorf tube. The sample was vortexed for 2-3 sec and incubated  
365 at room temperature for 2min. The entire 1ml whole blood and lysis buffer mix was loaded into  
366 sample preparation chamber of flex cart-01 for automated DNA extraction. 70ul PCR mastermix  
367 was simultaneously loaded in the PCR reaction chamber of the flex cart-01. The GeneXpert was  
368 programmed to elute DNA in 10ul volume which was used for the NAT2-PGx assay. PCR

369 mastermix included (2ul of 2U Aptataq exo-DNA polymerase, 1X Betaine, 1X PCR additive  
370 reagent, 1X Aptataq buffer, 8mM MgCl<sub>2</sub>, 400nM FP, 900nM reverse primers, 500nM of 191-  
371 Cy5.5 and 857-Alexa-405, 430nM 282-Alexa-647 and 590-FAM and 300nM 341-Alexa-537  
372 probes). PCR was initiated at holding stage- 50°C for 2min, initial denaturation at 94°C for  
373 2min, followed by 50 cycles of denaturation at 95°C for 15 sec, annealing at 57°C for 30 sec and  
374 extension at 65°C for 60 sec. The melting program included three steps: denaturation at 95°C for  
375 1 min, followed by renaturation at 40°C for 3 min and a continuous reading of fluorescence from  
376 40 to 72°C by heating at increments of 0.05°C/sec. The MMCA curve was analyzed using the  
377 GXP version 4.8 software.

378  
379 We validated the automated NAT2-PGx assay by analyzing 20 blood samples, for which  
380 polymorphisms in the 5 positions were confirmed by Sanger sequencing. We assessed analytical  
381 sensitivity of the assay and robustness to input blood volume by performing it on varying  
382 volumes of whole blood (200 ul, 100 ul, 50 ul, 25 ul) and comparing the T<sub>m</sub> results and standard  
383 deviation for each position across blood volumes.

384  
385 **Funding**

386  
387 FleXcartridges and technical support for their use were provided by Cepheid. This study was  
388 supported by the Institute for Immunity, Transplantation, and Infection and the Department of  
389 Medicine at Stanford University.

390  
391 **Reporting summary.** Further information on research design is available in the Nature Research  
392 Reporting Summary linked to this article.

393

394 **Data availability**

395 Data supporting the findings of this manuscript are available in the Supplementary Information  
396 files or from the corresponding author upon request.

397

398 **Code availability**

399

400 Code and dataset used to develop NAT2 classifier are provided with the manuscript.

401

402 **Acknowledgements**

403 We thank Veronique Dartois for performing the plasma drug level assays.

404

405 **Author contributions**

406 JRA and RV conceived of the study. RV, JC, and JRA designed the experiments. RV, SP,

407 FMM, MTV, ASS and JC collected data. RV, NZ, RS and JRA analyzed data. EW, DG and DP

408 provided technical guidance on the assay development. RV and JRA wrote the first draft of the

409 manuscript, and all authors contributed to the final version.

410 **Conflicts of Interest**

411 JRA and RV are named co-inventors on a provisional patent (Application number 62/991,477) for

412 a *NAT2* pharmacogenomic assay.

413 **References**

- 414 1. Gillespie SH. et al. Consortium. Four-month moxifloxacin-based regimens for drug-  
415 sensitive tuberculosis. *N Engl J Med.* 2014 Oct 23;371(17):1577-87.
- 416 2. Merle CS. et al. OFLOTUB/Gatifloxacin for Tuberculosis Project. A four-month  
417 gatifloxacin-containing regimen for treating tuberculosis. *N Engl J Med.* 2014 Oct  
418 23;371(17):1588-98.
- 419 3. Jindani A. et al. High-dose rifapentine with moxifloxacin for pulmonary tuberculosis. *N*  
420 *Engl J Med.* 2014 Oct 23;371(17):1599-608.
- 421 4. Pratt VM. et al. Characterization of 137 Genomic DNA Reference Materials for 28  
422 Pharmacogenetic Genes: A GeT-RM Collaborative Project. *J Mol Diagn.* 2016  
423 Jan;18(1):109-23.
- 424 5. García-Martín E. Interethnic and intraethnic variability of NAT2 single nucleotide  
425 polymorphisms. *Curr Drug Metab.* 2008 Jul;9(6):487-97.
- 426 6. Schaberg T et al. Risk factors for side-effects of isoniazid, rifampin and pyrazinamide in  
427 patients hospitalized for pulmonary tuberculosis. *Eur Respir J.* 1996 Oct;9(10):2026-30.
- 428 7. Saukkonen JJ. et al. Hepatotoxicity of Antituberculosis Therapy Subcommittee. An  
429 official ATS statement: hepatotoxicity of antituberculosis therapy. *Am J Respir Crit Care*  
430 *Med.* 2006 Oct 15;174(8):935-52.
- 431 8. Schutz C. et al. Burden of antituberculosis and antiretroviral drug-induced liver injury at  
432 a secondary hospital in South Africa. *S Afr Med J.* 2012 Mar 2;102(6):506-11.
- 433 9. Luzze H. et al. Relapse more common than reinfection in recurrent tuberculosis 1-2 years  
434 post treatment in urban Uganda. *Int J Tuberc Lung Dis.* 2013 Mar;17(3):361-7

- 435 10. Romanowski K. et al. Predicting tuberculosis relapse in patients treated with the standard  
436 6-month regimen: an individual patient data meta-analysis. *Thorax*. 2019 Mar;74(3):291-  
437 297.
- 438 11. Pasipanodya JG. et al. Meta-analysis of clinical studies supports the pharmacokinetic  
439 variability hypothesis for acquired drug resistance and failure of antituberculosis therapy.  
440 *Clin Infect Dis*. 2012 Jul;55(2):169-77.
- 441 12. Gumbo T. et al. Isoniazid bactericidal activity and resistance emergence: integrating  
442 pharmacodynamics and pharmacogenomics to predict efficacy in different ethnic  
443 populations. *Antimicrob Agents Chemother*. 2007 Jul;51(7):2329-36.
- 444 13. Pasipanodya JG. et al. Serum drug concentrations predictive of pulmonary tuberculosis  
445 outcomes. *J Infect Dis*. 2013 Nov 1;208(9):1464-73.
- 446 14. Kinzig-Schippers M, Tomalik-Scharte D, Jetter A, Scheidel B, Jakob V, Rodamer M,  
447 Cascorbi I, Doroshenko O, Sörgel F, Fuhr U. Should we use N-acetyltransferase type 2  
448 genotyping to personalize isoniazid doses? *Antimicrob Agents Chemother*. 2005  
449 May;49(5):1733-8.
- 450 15. Sabbagh A. et al. Worldwide distribution of NAT2 diversity: implications for NAT2  
451 evolutionary history. *BMC Genet*. 2008 Feb 27;9:21.
- 452 16. Wang PY. et al. NAT2 polymorphisms and susceptibility to anti-tuberculosis drug-  
453 induced liver injury: a meta-analysis. *Int J Tuberc Lung Dis*. 2012 May;16(5):589-95.
- 454 17. Du H. et al. Slow N-acetyltransferase 2 genotype contributes to anti-tuberculosis drug-  
455 induced hepatotoxicity: a meta-analysis. *Mol Biol Rep*. 2013 May;40(5):3591-6.
- 456 18. Azuma J. et al. Pharmacogenetics-based tuberculosis therapy research group. NAT2  
457 genotype guided regimen reduces isoniazid-induced liver injury and early treatment

- 458 failure in the 6-month four-drug standard treatment of tuberculosis: a randomized  
459 controlled trial for pharmacogenetics-based therapy. *Eur J Clin Pharmacol.* 2013  
460 May;69(5):1091-101.
- 461 19. Snider DE Jr. et al. Isoniazid-associated hepatitis deaths: a review of available  
462 information. *Am Rev Respir Dis.* 1992 Feb;145(2 Pt 1):494-7.
- 463 20. Kuznetsov IB. et al. A web server for inferring the human N-acetyltransferase-2 (NAT2)  
464 enzymatic phenotype from NAT2 genotype. *Bioinformatics.* 2009 May 1;25(9):1185-6.
- 465 21. Ramachandran G. et al. Role of pharmacogenomics in the treatment of tuberculosis: a  
466 review. *Pharmgenomics Pers Med.* 2012;5:89-98.
- 467 22. McInnes G. et al. Drug Response Pharmacogenetics for 200,000 UK Biobank  
468 Participants. doi: <https://doi.org/10.1101/2020.08.09.243311>
- 469 23. Rens NE. et al. Cost-Effectiveness of a Pharmacogenomic Test for Stratified Isoniazid  
470 Dosing in Treatment of Active Tuberculosis. *Clin Infect Dis.* 2020 Jan 6:ciz1212.
- 471 24. Sabbagh A. et al. Evaluating NAT2PRED for inferring the individual acetylation status  
472 from unphased genotype data. *BMC Med Genet.* 2009 Dec 31;10:148.
- 473 25. Sabbagh A. et al. Arylamine N-acetyltransferase 2 (NAT2) genetic diversity and  
474 traditional subsistence: a worldwide population survey. *PLoS One.* 2011 Apr  
475 6;6(4):e18507.
- 476 26. Van Oosterhout JJ. et al. Pharmacokinetics of Antituberculosis Drugs in HIV-Positive  
477 and HIV-Negative Adults in Malawi. *Antimicrob Agents Chemother.* 2015  
478 Oct;59(10):6175-80.
- 479 27. Wilkins JJ. et al. Variability in the population pharmacokinetics of isoniazid in South  
480 African tuberculosis patients. *Br J Clin Pharmacol.* 2011 Jul;72(1):51-62.



- 481 28. Wilkins JJ. et al. Population pharmacokinetics of rifampin in pulmonary tuberculosis  
482 patients, including a semimechanistic model to describe variable absorption. *Antimicrob*  
483 *Agents Chemother.* 2008 Jun;52(6):2138-48.
- 484 29. Wilkins JJ. et al. Variability in the population pharmacokinetics of pyrazinamide in South  
485 African tuberculosis patients. *Eur J Clin Pharmacol.* 2006 Sep;62(9):727-35.
- 486 30. Iselius L. et al. Formal genetics of isoniazid metabolism in man. *Clin Pharmacokinet.*  
487 1983 Nov-Dec;8(6):541-4.
- 488 31. Evans DA. Genetic variations in the acetylation of isoniazid and other drugs. *Ann N Y*  
489 *Acad Sci.* 1968 Jul 31;151(2):723-33.
- 490 32. Evans DA. An improved and simplified method of detecting the acetylator phenotype. *J*  
491 *Med Genet.* 1969 Dec;6(4):405-7.
- 492 33. Donald PR. et al. The influence of dose and N-acetyltransferase-2 (NAT2) genotype and  
493 phenotype on the pharmacokinetics and pharmacodynamics of isoniazid. *Eur J Clin*  
494 *Pharmacol.* 2007 Jul;63(7):633-9.
- 495 34. Lee SW. et al. NAT2 and CYP2E1 polymorphisms and susceptibility to first-line anti-  
496 tuberculosis drug-induced hepatitis. *Int J Tuberc Lung Dis.* 2010 May;14(5):622-6.
- 497 35. Roy B. et al. Predisposition of antituberculosis drug induced hepatotoxicity by  
498 cytochrome P450 2E1 genotype and haplotype in pediatric patients. *J Gastroenterol*  
499 *Hepatol.* 2006 Apr;21(4):784-6.
- 500 36. Simon T. et al. Combined glutathione-S-transferase M1 and T1 genetic polymorphism  
501 and tacrine hepatotoxicity. *Clin Pharmacol Ther.* 2000 Apr;67(4):432-7.
- 502 37. Strange RC. et al. Glutathione S-transferase: genetics and role in toxicology. *Toxicol*  
503 *Lett.* 2000 Mar 15;112-113:357-63.

- 504 38. Ramachandran G. et al. Role of pharmacogenomics in the treatment of tuberculosis: a  
505 review. *Pharmacogenomics Pers Med.* 2012;5:89-98.
- 506 39. Mukonzo JK. et al. Role of pharmacogenetics in rifampicin pharmacokinetics and the  
507 potential effect on TB-rifampicin sensitivity among Ugandan patients. *Trans R Soc Trop*  
508 *Med Hyg.* 2020 Feb 7;114(2):107-114.
- 509 40. Naidoo A. et al. Effects of genetic variability on rifampicin and isoniazid  
510 pharmacokinetics in South African patients with recurrent tuberculosis.  
511 *Pharmacogenomics.* 2019 Mar;20(4):225-240.
- 512 41. Medellin-Garibay SE. et al. A population approach of rifampicin pharmacogenetics and  
513 pharmacokinetics in Mexican patients with tuberculosis. *Tuberculosis (Edinb).* 2020  
514 Sep;124:101982.
- 515 42. *Database of arylamine N-acetyltransferases* (<http://nat.mbg.duth.gr>)
- 516 43. Clinical trial of six-month and four-month regimens of chemotherapy in the treatment of  
517 pulmonary tuberculosis. *Am Rev Respir Dis.* 1979 Apr;119(4):579-85.
- 518 44. Haley CA. Treatment of Latent Tuberculosis Infection. *Microbiol Spectr.* 2017 Apr;5(2).
- 519 45. Kuhn M. et al. (2019). caret: Classification and Regression Training. R package version  
520 6.0-84. <https://CRAN.R-project.org/package=caret>
- 521 46. Prideaux B. et al. The association between sterilizing activity and drug distribution into  
522 tuberculosis lesions. *Nat Med.* 2015 Oct;21(10):1223
- 523 47. Walter ND. et al. Transcriptional Adaptation of Drug-tolerant Mycobacterium  
524 tuberculosis During Treatment of Human Tuberculosis. *J Infect Dis.* 2015 Sep  
525 15;212(6):990-8.

- 526 48. Chomczynski P. A reagent for the single-step simultaneous isolation of RNA, DNA and  
527 proteins from cell and tissue samples. *Biotechniques*. 1993 Sep;15(3):532-4, 536-7.
- 528 49. Beal SL. Et al. NONMEM 7.4 Users Guides. (1989– 2019). ICON plc, Gaithersburg,  
529 MD. <https://nonmem.iconplc.com/nonmem744>
- 530 50. Lindbom L. et al. (2004). Perl-speaks-NONMEM (PsN)--a Perl module for NONMEM  
531 related programming. *Comput Methods Programs Biomed*, 75 (2), 85-94.
- 532
- 533
- 534
- 535

536 **Figure 1. Predicted NAT2 phenotype from sputum samples and associated acetylation ratio**  
537 **and isoniazid clearance rates from patients receiving tuberculosis treatment.** The (a) 8 hour  
538 acetyl-INH to INH ratio and (b) isoniazid clearance rates, according to acetylation phenotype  
539 predicted from 5 SNPs, measured in sputum samples from 49 patients receiving treatment for  
540 active tuberculosis.

541  
542 **Figure 2. Schemata for the automated NAT2 Pharmacogenomic assay.** 1-2 drops of blood is  
543 collected in an Eppendorf tube and mixed with lysis buffer to a total of 1 ml, which is then  
544 loaded onto a GeneXpert Flex01 cartridge and placed into a GeneXpert instrument for automated  
545 DNA extraction, asymmetric PCR and meltcurve analysis. Allele patterns for each of the 5 SNPs  
546 are determined by Tm analysis, and the resulting data are used to predict acetylator phenotype.

547  
548 **Figure 3. Negative derivative transformed melt curves for the five NAT2 gene**  
549 **polymorphisms.** The shift in melt curve temperature is observed during a nucleotide exchange.  
550 Sloppy molecular beacon probes are first hybridized and then melted off of their NAT2 target  
551 amplicon. The melt curves indicate wild type alleles at positions 191(red), 341(green) and 857  
552 (orange); and mutant alleles at positions 282(Blue) and 590(Purple).

553  
554 **Figure 4. Effect of whole blood sample volume on melting temperature for wild type and**  
555 **mutant alleles at 5 positions in NAT2:** NAT2 polymorphisms were accurately detected at all  
556 volumes with sufficient different in melting temperature (Tm) to distinguish wild type from  
557 mutant alleles. No individuals in this dataset had mutations at position 191.

558

559 **Table 1. Summary of populations included in genomic analysis and their acetylation**  
560 **genotypes.**

561

| <b>Region</b>          | <b>Number of individuals</b> | <b>Acetylation Genotype, n (%)</b> |                     |                   |
|------------------------|------------------------------|------------------------------------|---------------------|-------------------|
|                        |                              | <b>Slow</b>                        | <b>Intermediate</b> | <b>Rapid</b>      |
| Americas               | 1,112                        | 432 (39%)                          | 463 (42%)           | 217 (20%)         |
| Central and South Asia | 588                          | 355 (60%)                          | 198 (34%)           | 35 (6%)           |
| East Asia              | 2,308                        | 340 (15%)                          | 1049 (45%)          | 919 (40%)         |
| Europe                 | 3,458                        | 1966 (57%)                         | 1249 (36%)          | 243 (7%)          |
| North Africa           | 44                           | 30 (68%)                           | 10 (23%)            | 4 (9%)            |
| sub-Saharan Africa     | 1,051                        | 450 (43%)                          | 459 (44%)           | 142 (14%)         |
| <b>Total</b>           | <b>8,561</b>                 | <b>3573 (42%)</b>                  | <b>3428 (40%)</b>   | <b>1560 (18%)</b> |

562

563

564 **Table 2. Out-of-sample prediction accuracy of unphased NAT2 SNP data for acetylation**

565 **phenotype in random forest models.** Models were trained with 5,738 individuals and tested on

566 2,823 individuals. Sens: sensitivity. Spec: specificity.

567

| <b>NAT2 SNP Positions</b>         | <b>SNP number</b> | <b>Accuracy</b> | <b>95% CI</b> | <b>Sens. Rapid</b> | <b>Spec. Rapid</b> | <b>Sens. Slow</b> | <b>Spec Slow</b> |
|-----------------------------------|-------------------|-----------------|---------------|--------------------|--------------------|-------------------|------------------|
| 191, 282, 341, 481, 590, 803, 857 | 7                 | 1.000           | (0.999-1.000) | 1.000              | 1.000              | 1.000             | 1.000            |
| 191, 282, 341, 481, 590, 857      | 6                 | 1.000           | (0.999-1.000) | 1.000              | 1.000              | 1.000             | 1.000            |
| 191, 282, 341, 590, 857           | 5                 | 1.000           | (0.999-1.000) | 1.000              | 1.000              | 1.000             | 1.000            |
| 282, 341, 590, 857                | 4                 | 0.978           | (0.972-0.983) | 0.996              | 0.988              | 0.969             | 0.999            |
| 341, 590, 847                     | 3                 | 0.976           | (0.970-0.982) | 1.000              | 0.986              | 0.967             | 1.000            |
| 341, 590                          | 2                 | 0.852           | (0.838-0.865) | 1.000              | 0.889              | 0.832             | 1.000            |

568

569

570

571

572

573

574

575 **Table 3. Melting temperature (T<sub>m</sub>) values for five NAT2 polymorphisms derived from**  
 576 **DNA-probe hybrid melts using single-plex assays validated on 49 pulmonary TB patients**  
 577

|                          | <b>Mutant</b>          | <b>Wild type</b>       | <b>Het</b>             | <b>Mutant</b>       | <b>Wild type</b>    |                         |
|--------------------------|------------------------|------------------------|------------------------|---------------------|---------------------|-------------------------|
| <b>NAT2 SNP position</b> | Total samples analyzed | Total samples analyzed | Total samples analyzed | T <sub>m</sub> ± SD | T <sub>m</sub> ± SD | ΔT <sub>m</sub> (WT-MT) |
| 191                      | 0                      | 44                     | 5                      | 66.3 ± 0.28         | 61.92 ± 0.68        | 4.38                    |
| 282                      | 6                      | 24                     | 19                     | 62.81 ± 0.40        | 66.85 ± 0.34        | 4.04                    |
| 341                      | 12                     | 23                     | 14                     | 66.30± 0.48         | 68.70 ± 0.38        | 2.40                    |
| 590                      | 0                      | 35                     | 14                     | 68.0 ± 0.28         | 64.37 ± 0.28        | 3.63                    |
| 857                      | 1                      | 41                     | 7                      | 66.4± 0.11          | 62.72 ± 0.29        | 3.68                    |

578 SD: Standard deviation

579

580

581 **Supplementary Table 1.** *NAT2* polymorphism profiles of 49 pulmonary TB patients detected  
582 from 5-SNP and 7-SNP genotyping assays. Acetylator phenotypes predicted from 5-SNP, 6-SNP  
583 and 7-SNP classifiers and plasma INH and acetyl-INH levels recorded at various time-points.

584

585 **Supplementary Table 2.** (a) *NAT2* genotype of whole blood samples (n=20) analyzed on 5-  
586 plex *NAT2*-PGx assay and validated on Sanger sequencing. (b) *NAT2* genotypes of ten whole  
587 blood samples analyzed using 200ul, 100ul, 50ul and 25ul samples

588

589 **Supplementary Table 3.** Population information on the dataset used to develop 5-SNP  
590 classifier.

591

592 **Supplementary Table 4.** List of primers and probes sequences for multiplex assay with their  
593 corresponding fluorophores and quenchers

594

595



**A**

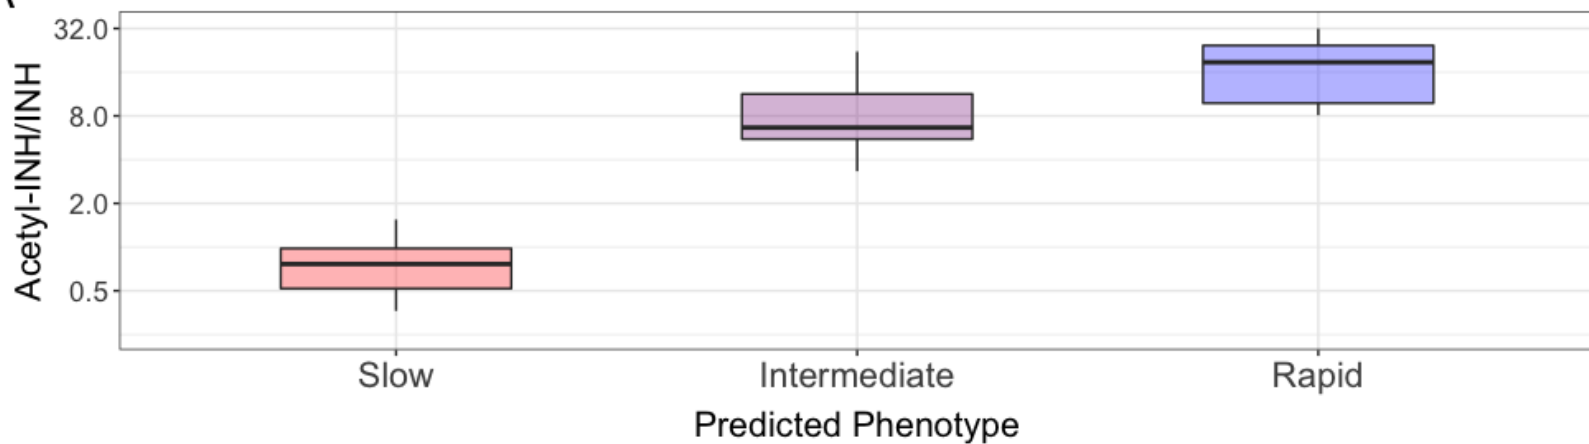

**B**

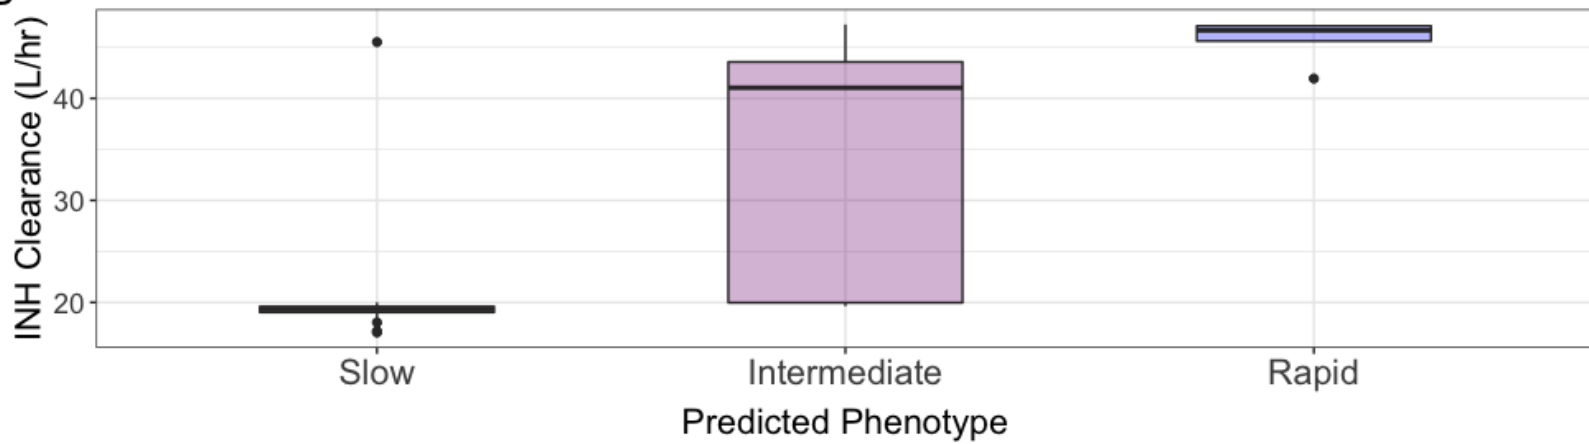

# 1 Sample collection

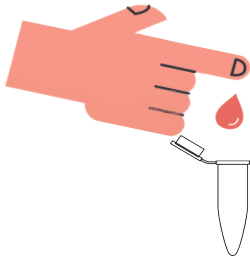

Collect 1-2 drops of whole blood (approx. 50ul)

# 2 Whole blood pretreatment

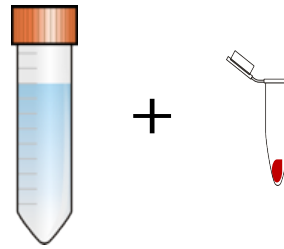

Mix 950ul lysis buffer, vortex for 2 sec and incubate at RT for 2min

# 3 Flex cart01 preparation

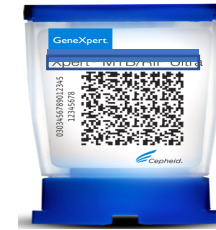

Pipette 1ml pretreated sample and 70ul PCR mastermix into the cartridge

# 4 Automated DNA extraction & qPCR

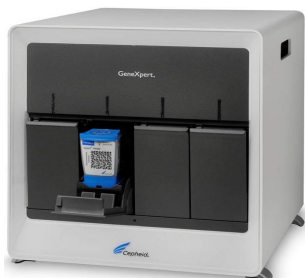

Total run time= 140min

Load the cartridge in the GeneXpert machine and start the run

# 5 Data acquisition

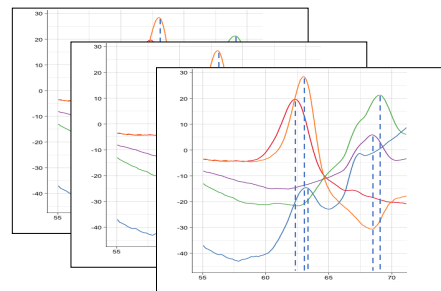

Acquire melt curve data for NAT2 gene polymorphism detection

# 6 INH acetylator phenotype prediction

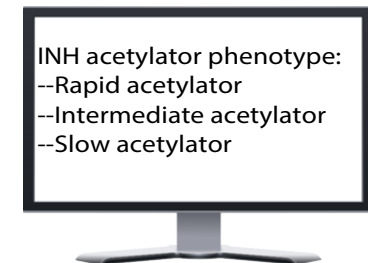

INH acetylator phenotype:  
--Rapid acetylator  
--Intermediate acetylator  
--Slow acetylator

Upload NAT2 polymorphism data on phenotype prediction algorithm

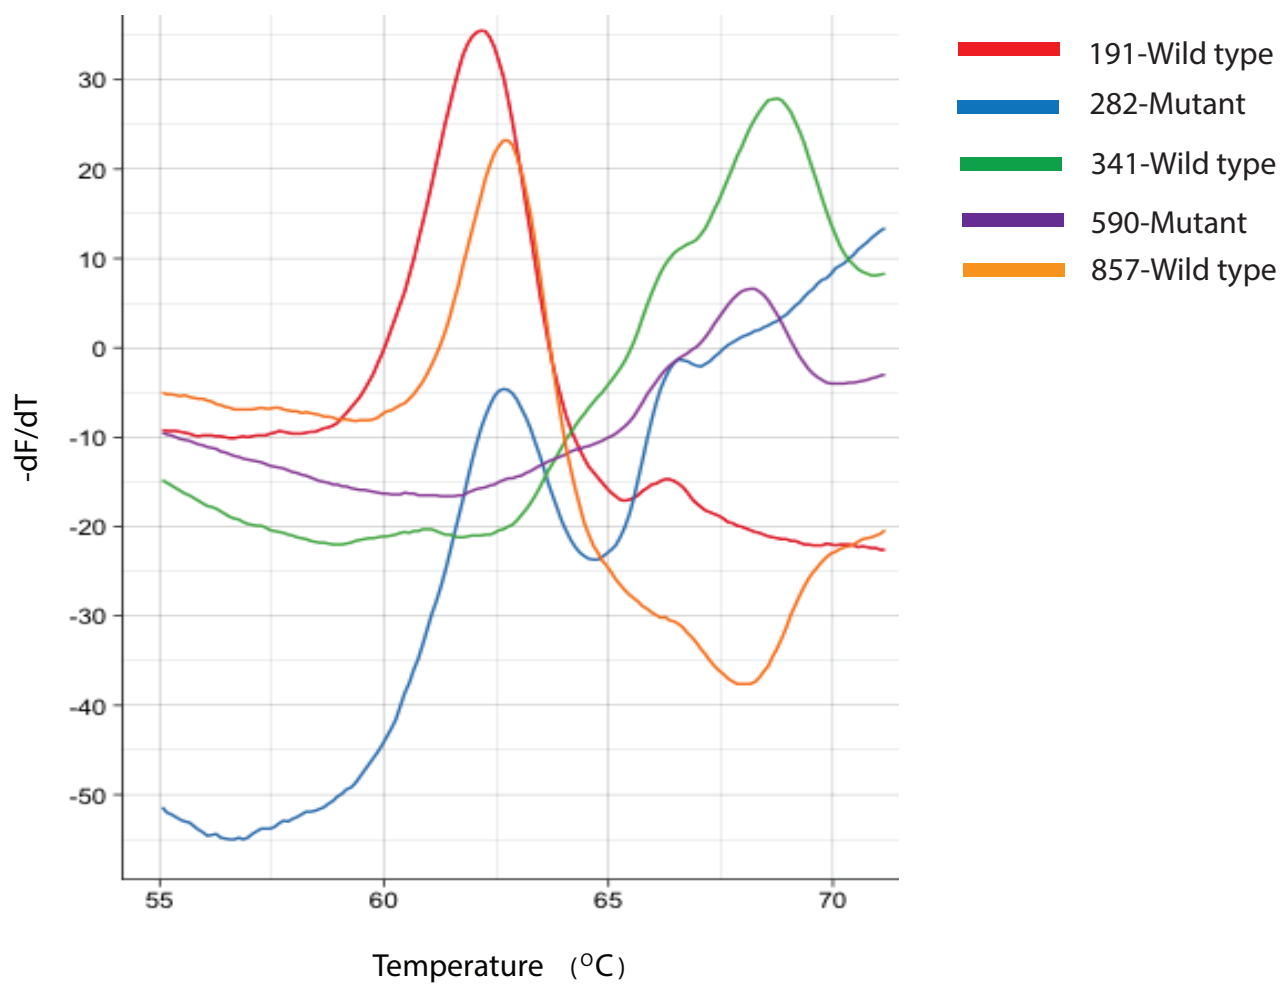

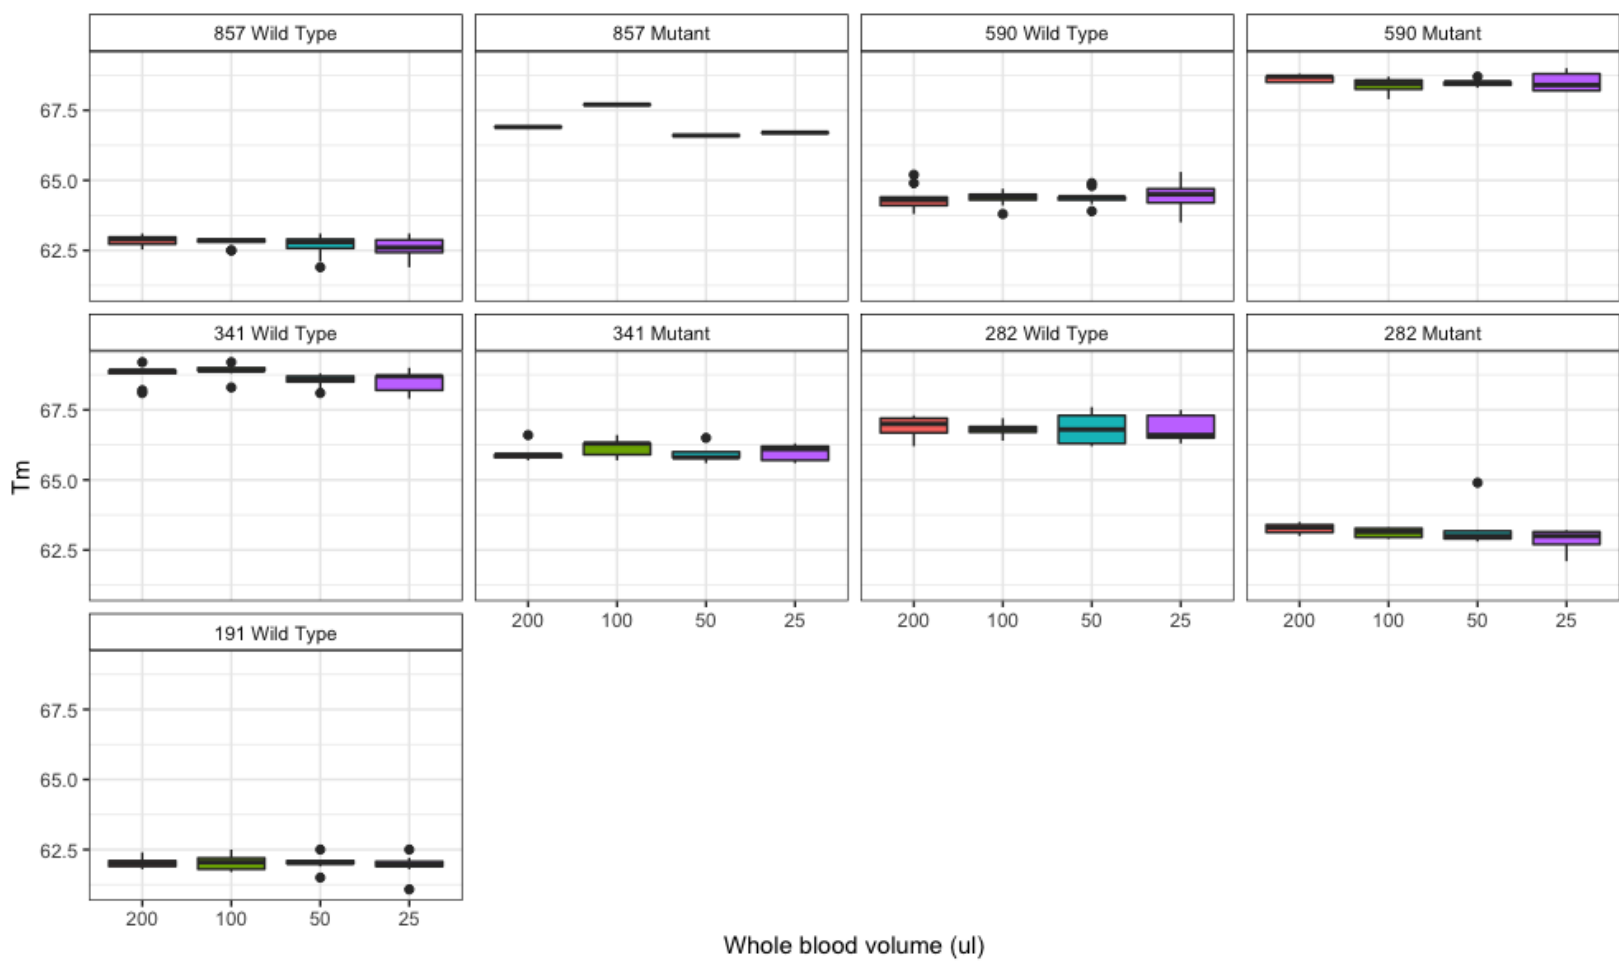

Source: https://medrxiv.org/content/10.1101/2021.01.17.21249995v1.full.pdf
